# Supplementary material for: Analysis of bonding motifs in unusual molecules II: infinitene
Source: Royal Society of Chemistry journal article supplement (doi:10.1039/d4cp01802h), 2024-01-01
Supplement: d4cp01802h1.pdf [file d4cp01802h1.pdf]

## Analysis of Bonding Motifs in Unusual Molecules: Planar Hexacoordinated Carbon and Infitene

Katherine N. Ferreras, Taylor Harville, Daniel Del Angel Cruz, and Mark S. Gordon

### Supporting Information

Optimized geometries of all relevant molecules are given in .xyz format in a .zip folder.

#### Benzene

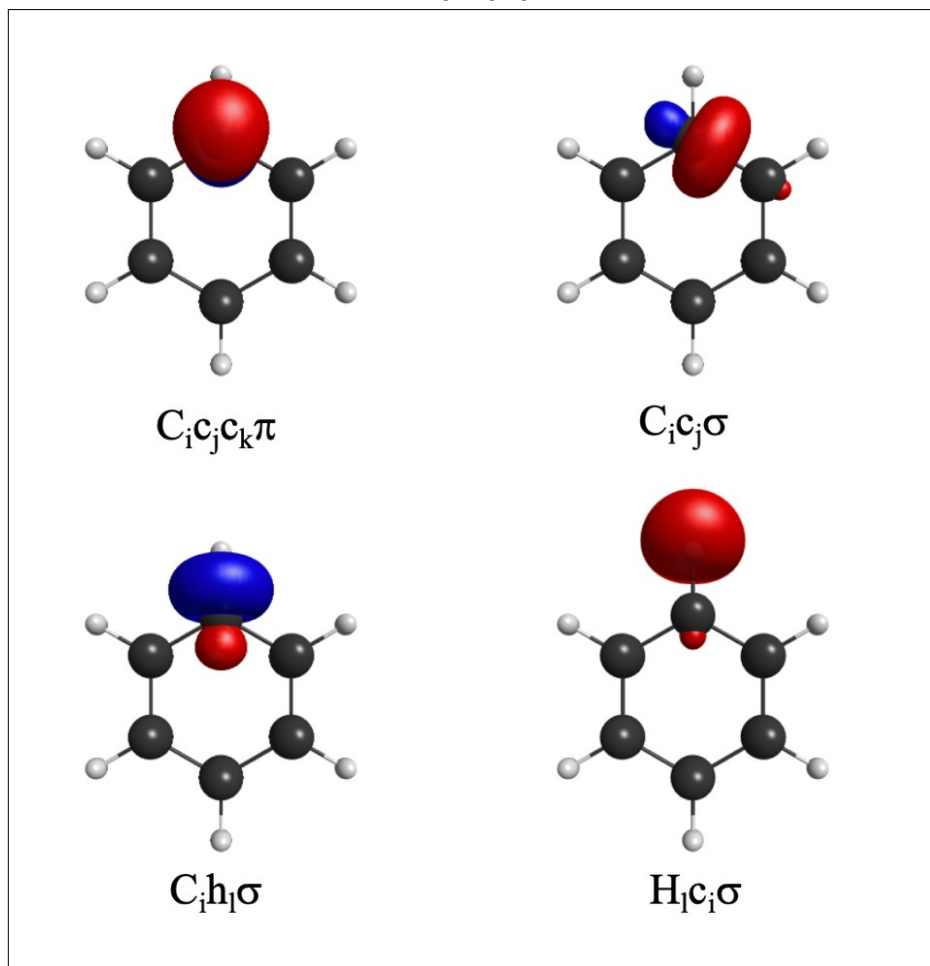

SI Figure SI:1. Symmetric unique  $\sigma$  and  $\pi$ - QAOs in benzene. Subscripted letters,  $i, j, k$ , and  $l$  correspond to different atoms. The structure of benzene was optimized at the RHF/6-31G(d) level of theory. Bond lengths for CC = 1.39 Å and CH = 1.08 Å.

### Ethene

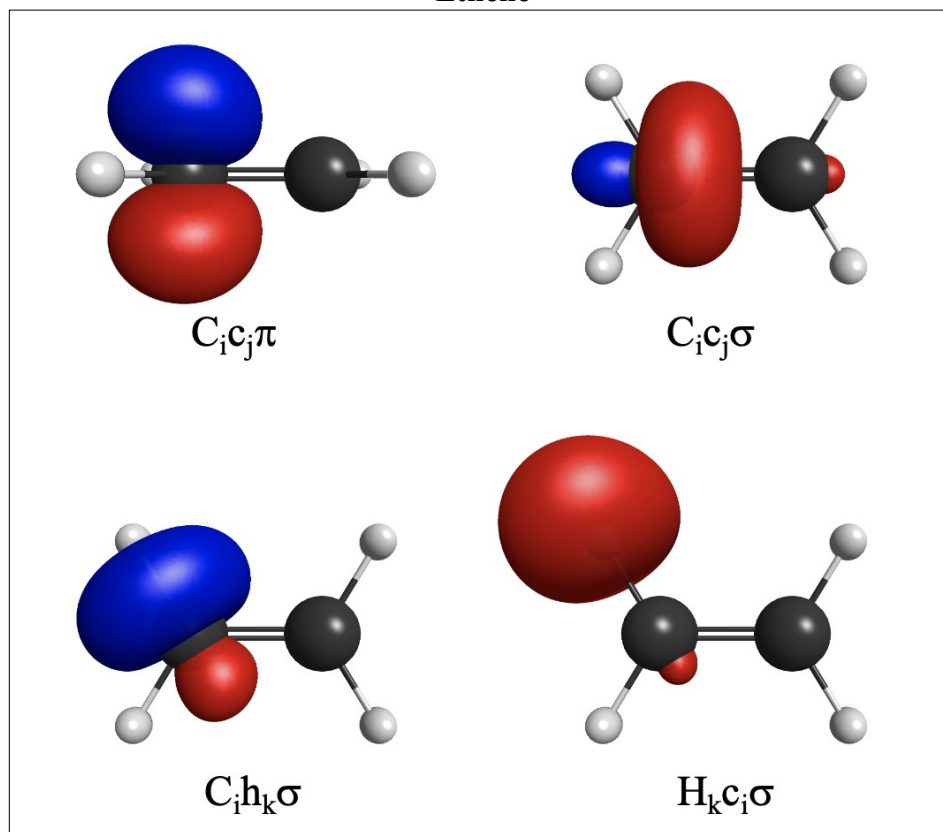

SI Figure SI:2. Symmetric unique  $\sigma$  and  $\pi$ - QUAOs in ethene. Subscripted letters,  $i, j$ , and  $k$  correspond to different atoms. The structure of ethene was optimized at the RHF/6-31G(d) level of theory. Bond lengths for CC = 1.34 Å and CH= 1.09 Å.

SI Table SI:1: Symmetric unique  $\sigma$  and  $\pi$ - Bonding interactions in ethene. Orbital occupations, bond occupation totals, bond orders, and KBOs (kcal/mol) are shown for non-repetitive interactions. The structure of ethene was optimized at the RHF/6-31G(d) level of theory. Bond lengths for CC = 1.34 Å and CH= 1.09 Å.

| Orbital I        | Occupation I | Orbital J        | Occupation J | Bond Total | BO   | KBO (kcal/mol) |
|------------------|--------------|------------------|--------------|------------|------|----------------|
| $C_i c_j \sigma$ | 1.00         | $C_j c_i \sigma$ | 1.00         | 2.00       | 0.99 | -53.3          |
| $H_k c_j \sigma$ | 0.86         | $C_j h_k \sigma$ | 1.14         | 2.00       | 0.98 | -38.0          |
| $C_i c_j \pi$    | 1.00         | $C_j c_i \pi$    | 1.00         | 2.00       | 1.00 | -23.0          |

SI Table SI:2: Orbital hybridization fraction, s- and p-character, in ethene. SI Figure X3. Non-repetitive  $\sigma$  and  $\pi$ - bonding interactions in naphthalene. Bond orders (above arrow), and KBOs (below arrow) in kcal/mol are shown between pairs of bonding QUAOs.

| Orbital          | s-fraction | p-fraction |
|------------------|------------|------------|
| $C_i c_j \sigma$ | 0.34       | 0.66       |
| $C_i h_k \sigma$ | 0.27       | 0.73       |
| $C_i c_j \pi$    | 0.00       | 1.00       |
| $H_k c_i \sigma$ | 1.00       | 0.00       |

### Naphthalene

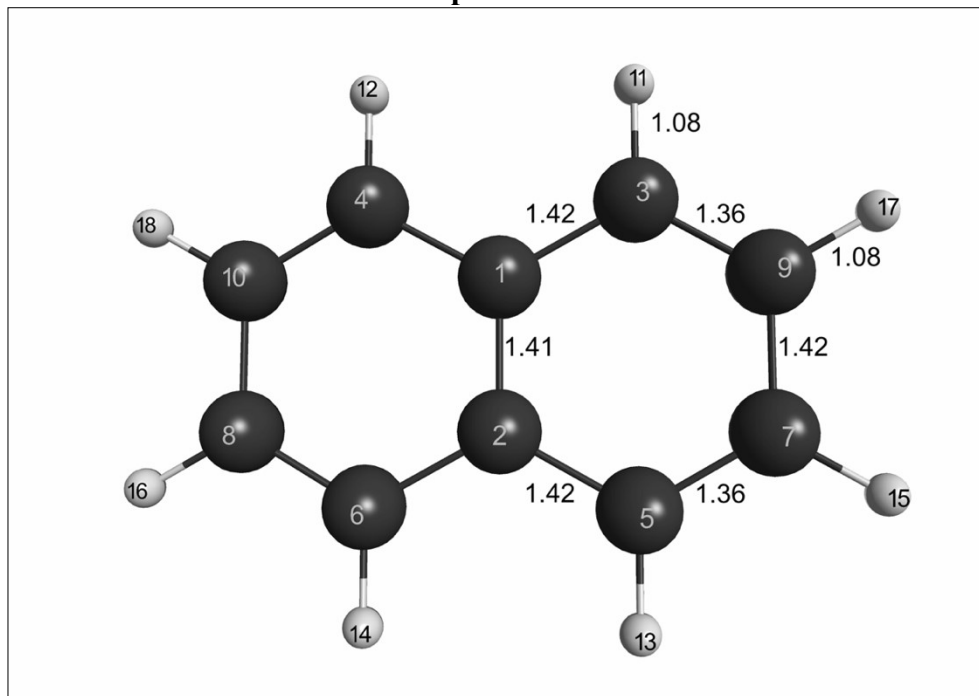

SI Figure SI:3: Optimized structure of naphthalene at the RHF/6-31G(d) level of theory. Carbon-carbon and carbon-hydrogen bond lengths are shown in angstrom.

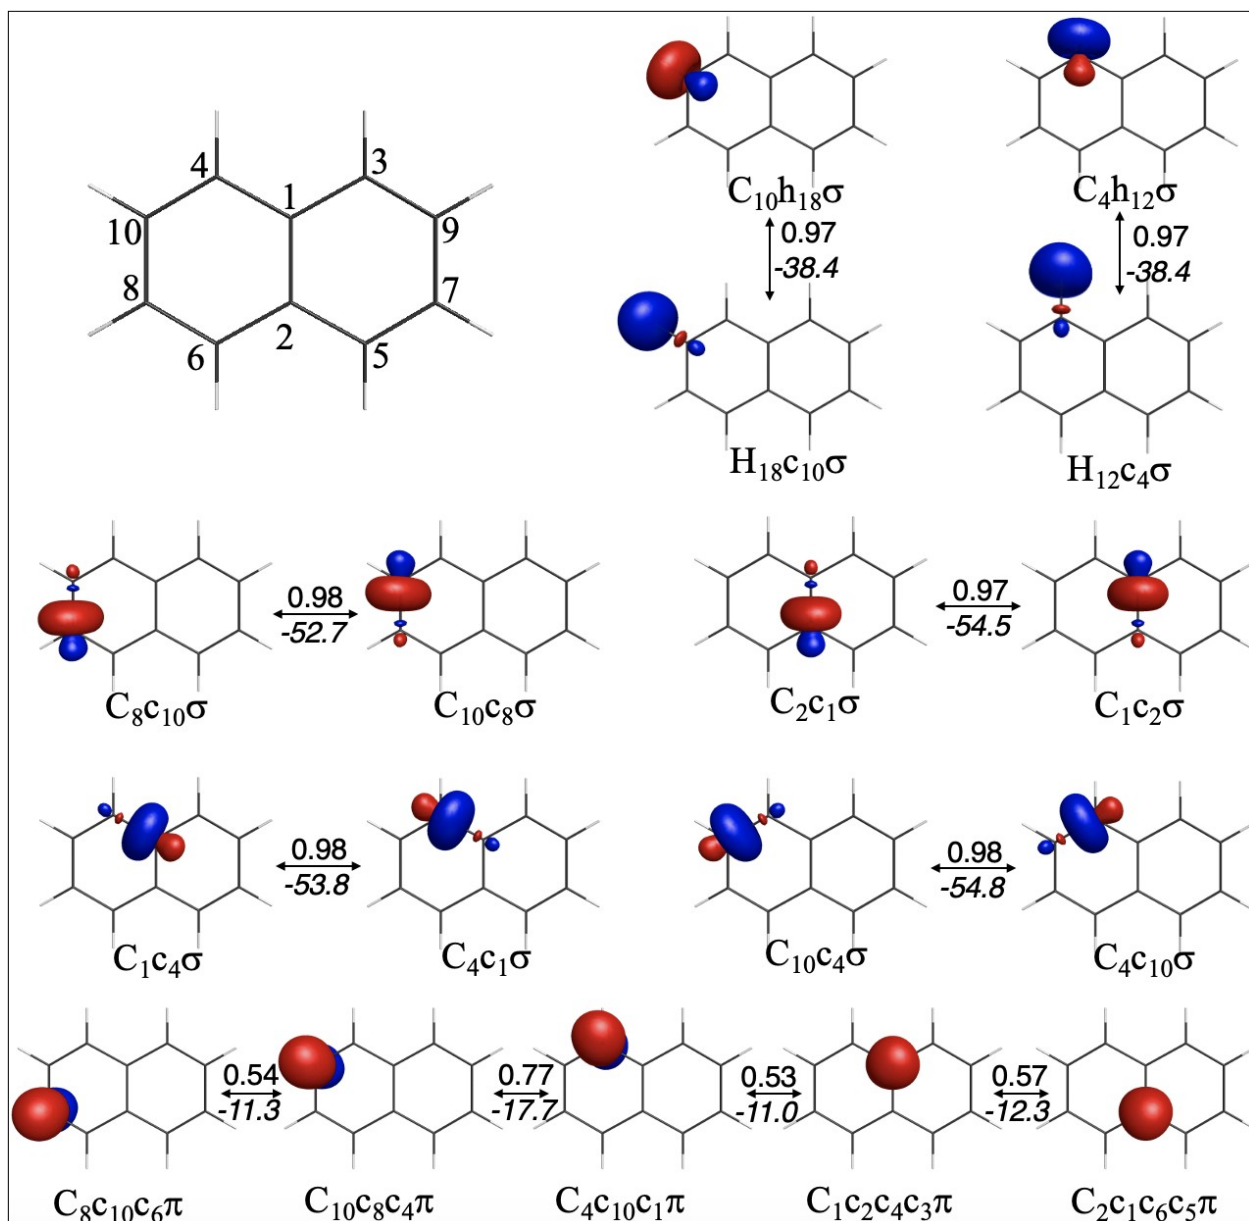

SI Figure SI:4. Non-repetitive  $\sigma$  and  $\pi$ -bonding interactions in naphthalene. Bond orders (above arrow), and KBOs (below arrow) in kcal/mol are shown between pairs of bonding QUAOs.

SI Table SI:3:  $\sigma$  and  $\pi$ -Bonding interactions in naphthalene. Orbital occupations, bond occupation totals, bond orders, and KBOs (kcal/mol) are shown for non-repetitive interactions. Numbers display in table reference the atom numbered on SI Figure X3.

| Orbital I         | Occupation I | Orbital J         | Occupation J | Bond Total | BO   | KBO (kcal/mol) |
|-------------------|--------------|-------------------|--------------|------------|------|----------------|
| $C_8c_6\sigma$    | 1.00         | $C_6c_8\sigma$    | 1.00         | 2.00       | 0.98 | -54.8          |
| $C_1c_2\sigma$    | 1.00         | $C_2c_1\sigma$    | 1.00         | 2.00       | 0.97 | -54.5          |
| $C_1c_4\sigma$    | 1.00         | $C_4c_1\sigma$    | 1.00         | 2.00       | 0.98 | -53.8          |
| $C_8c_{10}\sigma$ | 1.00         | $C_{10}c_8\sigma$ | 1.00         | 2.00       | 0.98 | -52.7          |
| $H_{12}c_4\sigma$ | 0.86         | $C_4h_{12}\sigma$ | 1.14         | 2.00       | 0.97 | -38.4          |

|                   |      |                   |      |      |      |       |
|-------------------|------|-------------------|------|------|------|-------|
| $C_4c_{10}c_1\pi$ | 1.00 | $C_{10}c_8c_4\pi$ | 1.00 | 2.00 | 0.77 | -17.7 |
| $C_2c_1c_6c_5\pi$ | 1.00 | $C_1c_2c_4c_3\pi$ | 1.00 | 2.00 | 0.57 | -12.3 |
| $C_8c_{10}c_6\pi$ | 1.00 | $C_{10}c_8c_4\pi$ | 1.00 | 2.00 | 0.54 | -11.3 |
| $C_4c_{10}c_1\pi$ | 1.00 | $C_1c_2c_4c_3\pi$ | 1.00 | 2.00 | 0.53 | -11.0 |

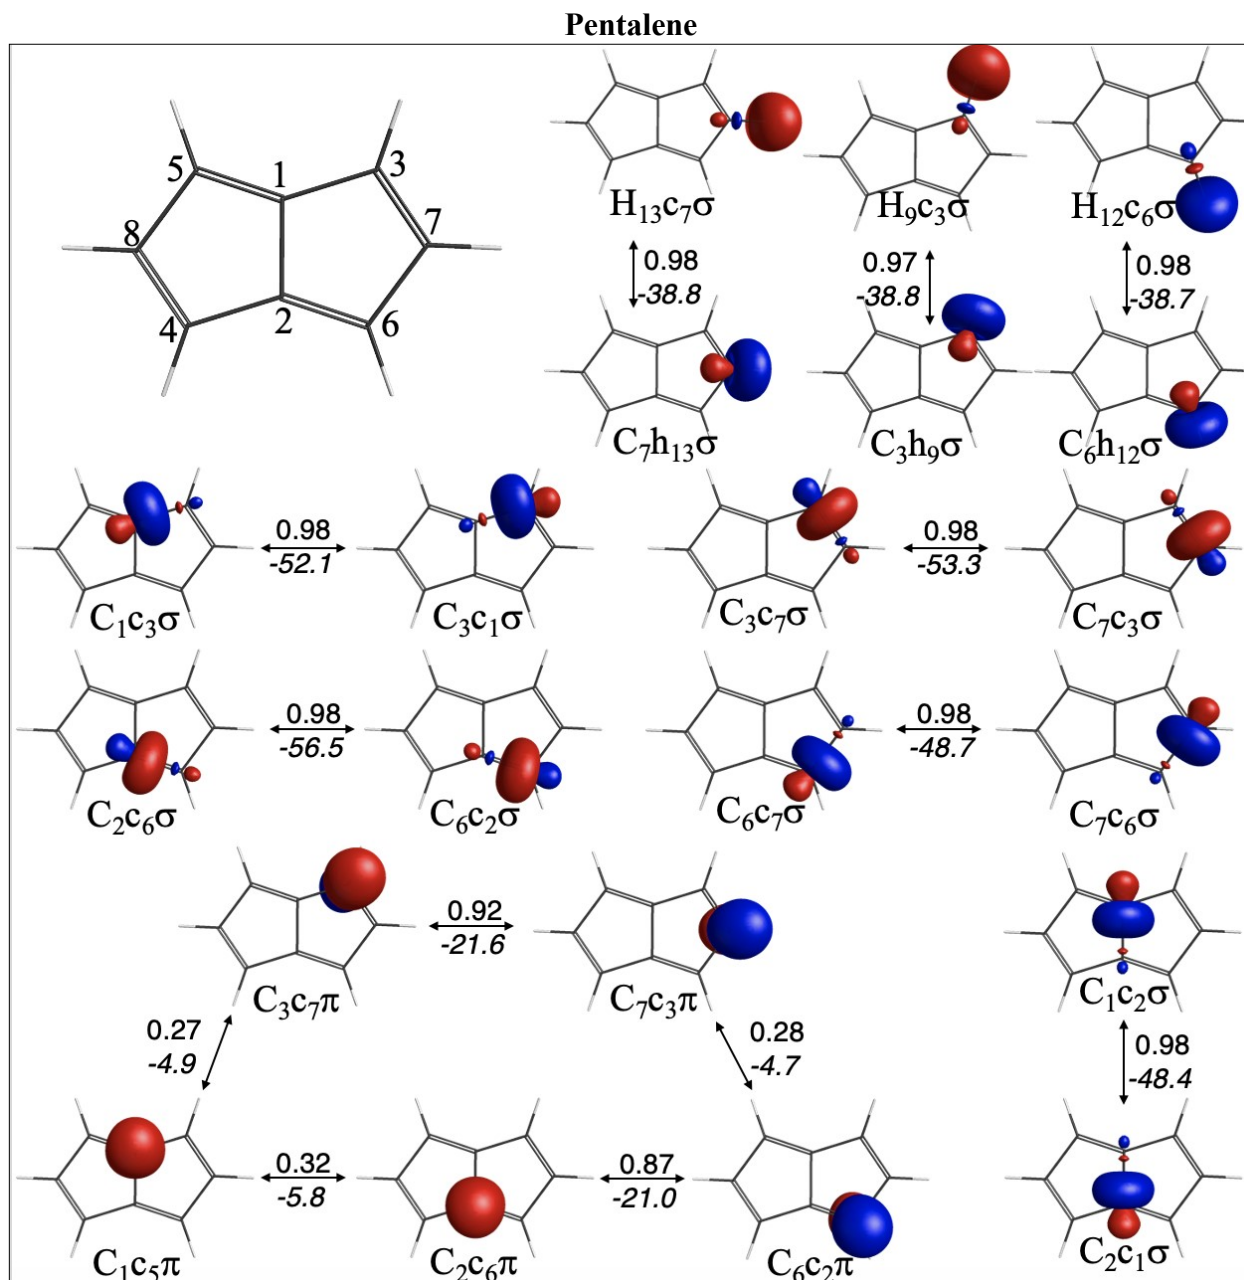

SI Figure SI:5. Non-repetitive  $\sigma$  and  $\pi$ -bonding interactions in pentalene. Bond orders (above arrow), and KBOs (below arrow) in kcal/mol are shown between pairs of bonding QUAOs.

SI Table SI:4:  $\sigma$  and  $\pi$ - Bonding interactions in pentalene. Orbital occupations, bond occupation totals, bond orders, and KBOs (kcal/mol) are shown for non-repetitive interactions. Numbers display in table reference the atom numbered in Figure 3.

| Orbital I         | Occupation I | Orbital J         | Occupation J | Bond Total | BO   | KBO (kcal/mol) |
|-------------------|--------------|-------------------|--------------|------------|------|----------------|
| $C_6c_2\sigma$    | 1.00         | $C_2c_6\sigma$    | 1.00         | 2.00       | 0.98 | -56.5          |
| $C_3c_7\sigma$    | 1.00         | $C_7c_3\sigma$    | 0.99         | 1.99       | 0.98 | -53.3          |
| $C_1c_3\sigma$    | 1.01         | $C_3c_1\sigma$    | 0.99         | 2.00       | 0.98 | -52.1          |
| $C_7c_6\sigma$    | 0.98         | $C_6c_7\sigma$    | 1.01         | 1.99       | 0.98 | -48.7          |
| $C_1c_2\sigma$    | 0.99         | $C_2c_1\sigma$    | 0.99         | 1.98       | 0.98 | -48.4          |
| $H_{13}c_7\sigma$ | 0.86         | $C_7h_7\sigma$    | 1.15         | 2.01       | 0.98 | -38.8          |
| $H_9c_3\sigma$    | 0.85         | $C_3h_9\sigma$    | 1.16         | 2.01       | 0.97 | -38.8          |
| $H_{12}c_6\sigma$ | 0.85         | $C_6h_{12}\sigma$ | 1.16         | 2.01       | 0.98 | -38.7          |
| $C_7c_3\pi$       | 1.03         | $C_3c_7\pi$       | 1.00         | 2.03       | 0.92 | -21.6          |
| $C_2c_6\pi$       | 1.03         | $C_6c_2\pi$       | 0.94         | 1.97       | 0.87 | -21.0          |
| $C_1c_5\pi$       | 1.03         | $C_2c_6\pi$       | 1.03         | 2.06       | 0.32 | -5.8           |
| $C_3c_7\pi$       | 1.00         | $C_1c_5\pi$       | 1.03         | 2.03       | 0.27 | -4.9           |
| $C_7c_3\pi$       | 1.03         | $C_6c_2\pi$       | 0.94         | 1.97       | 0.28 | -4.7           |

Kekulene

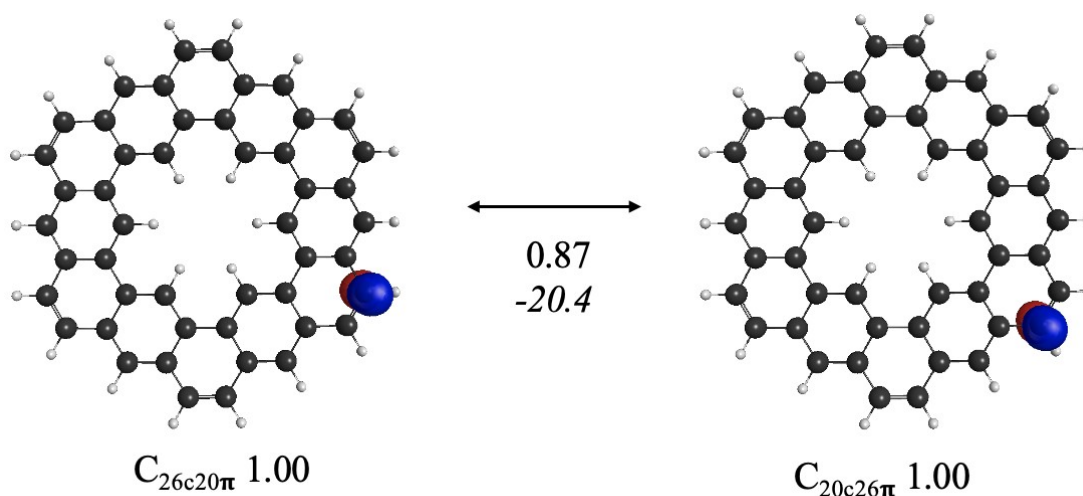

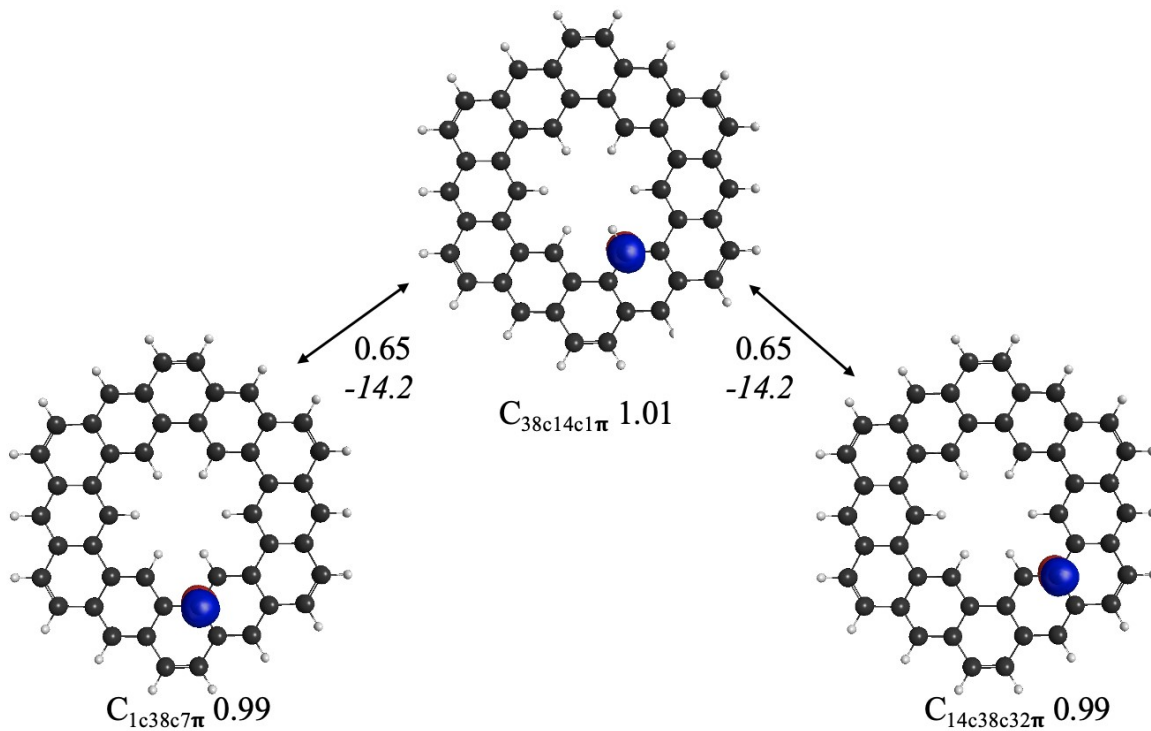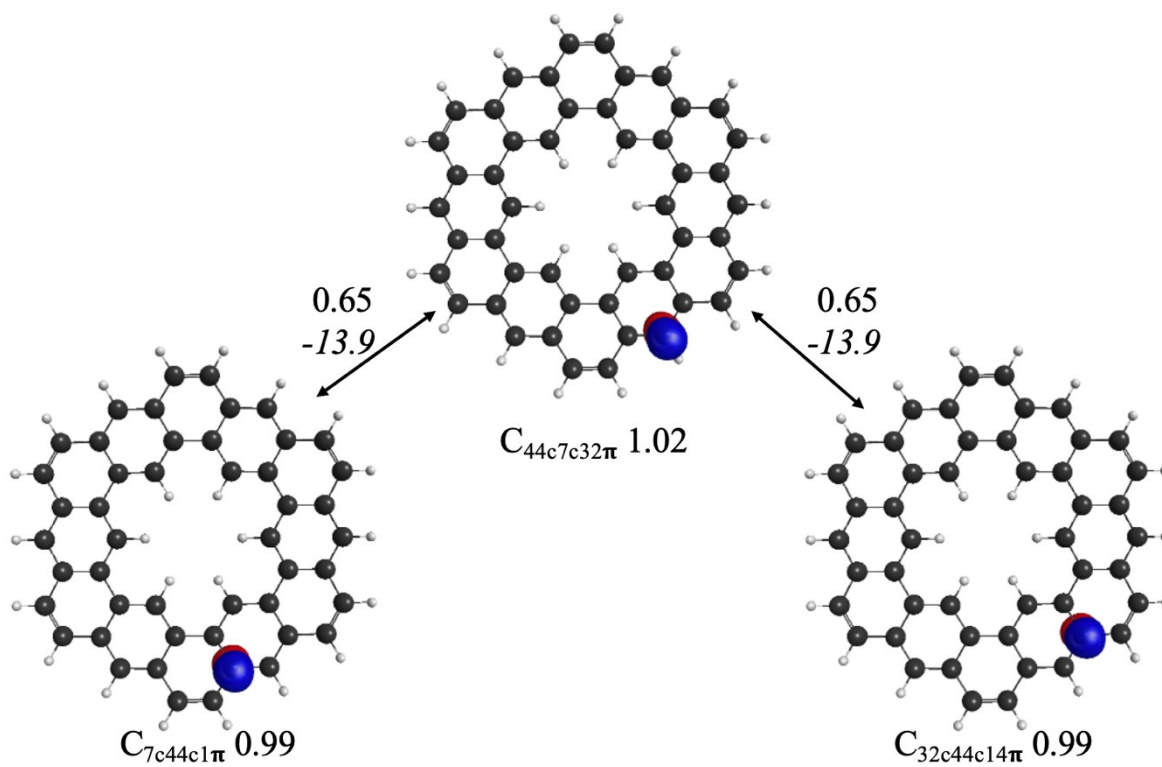

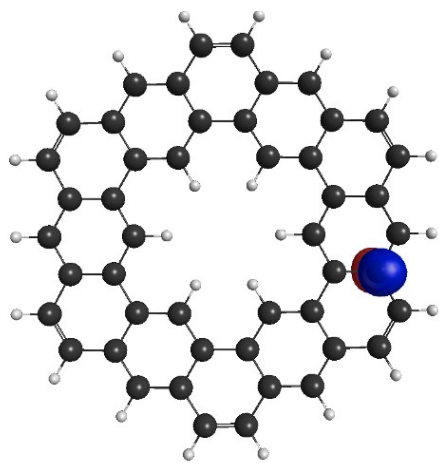

$C_{8c45c2\pi}$  0.99

0.38  
-7.2

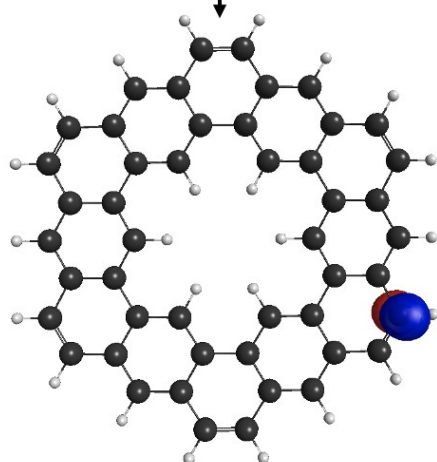

$C_{20c26\pi}$  1.00

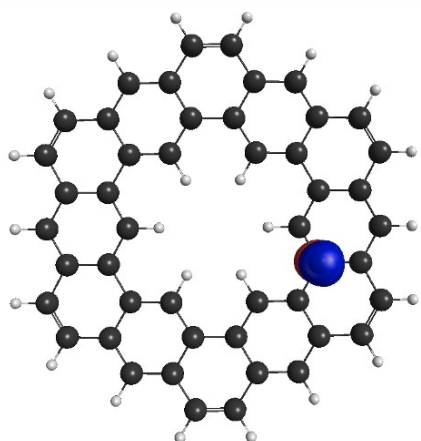

$C_{2c39c8\pi}$  0.99

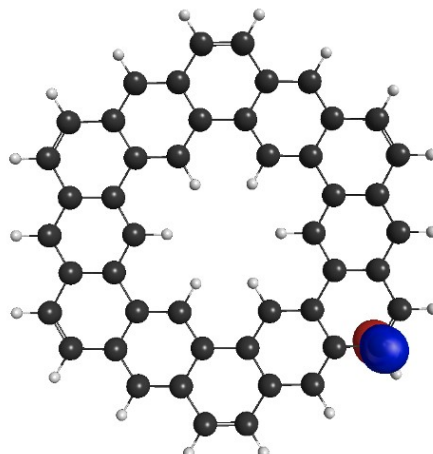

$C_{26c20\pi}$  1.00

0.38  
-7.2

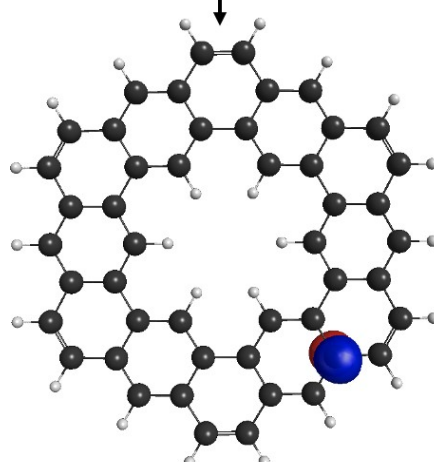

$C_{32c44c14\pi}$  0.99

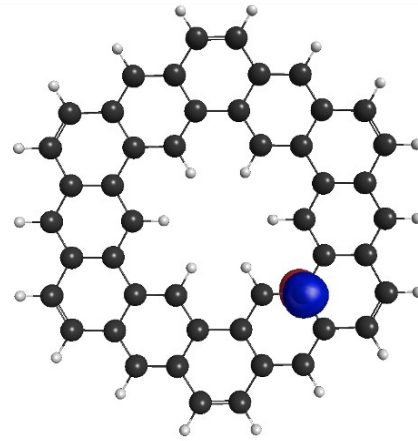

$C_{14c38c32\pi}$  0.99

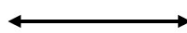

0.36  
-6.9



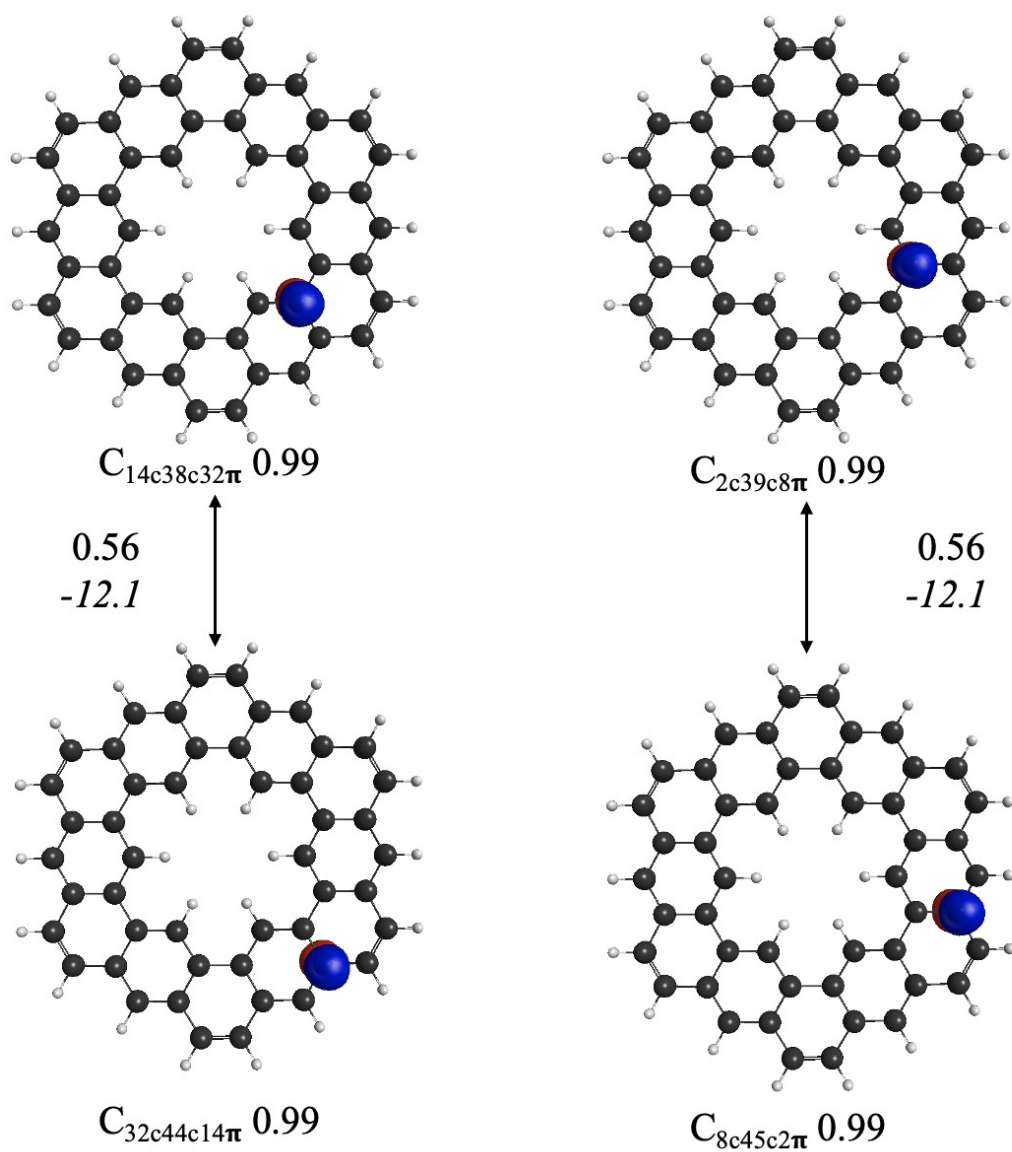

SI Figure SI:6. Non-repetitive  $\sigma$  and  $\pi$ - bonding interactions in kekulene. Bond orders (below arrow), and KBOs (in italics) in kcal/mol are shown between pairs of bonding QUAOs. Each QUAO label is given below each QUAO representation along with the QUAO population.

# Infinitone

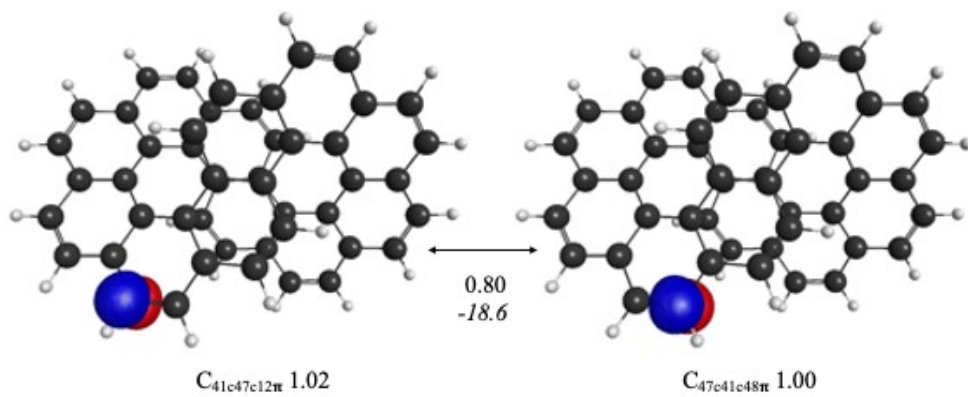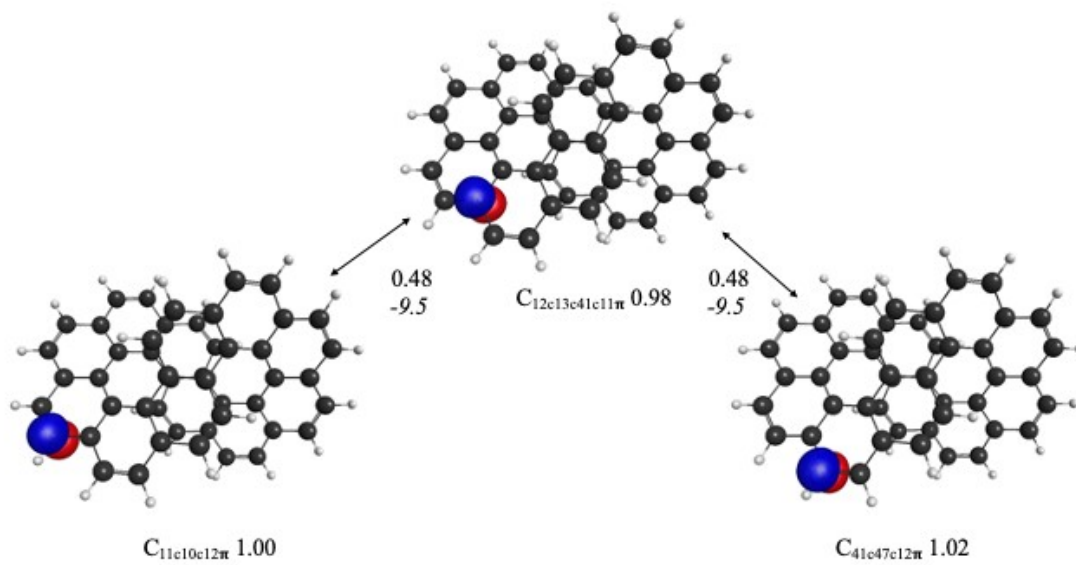

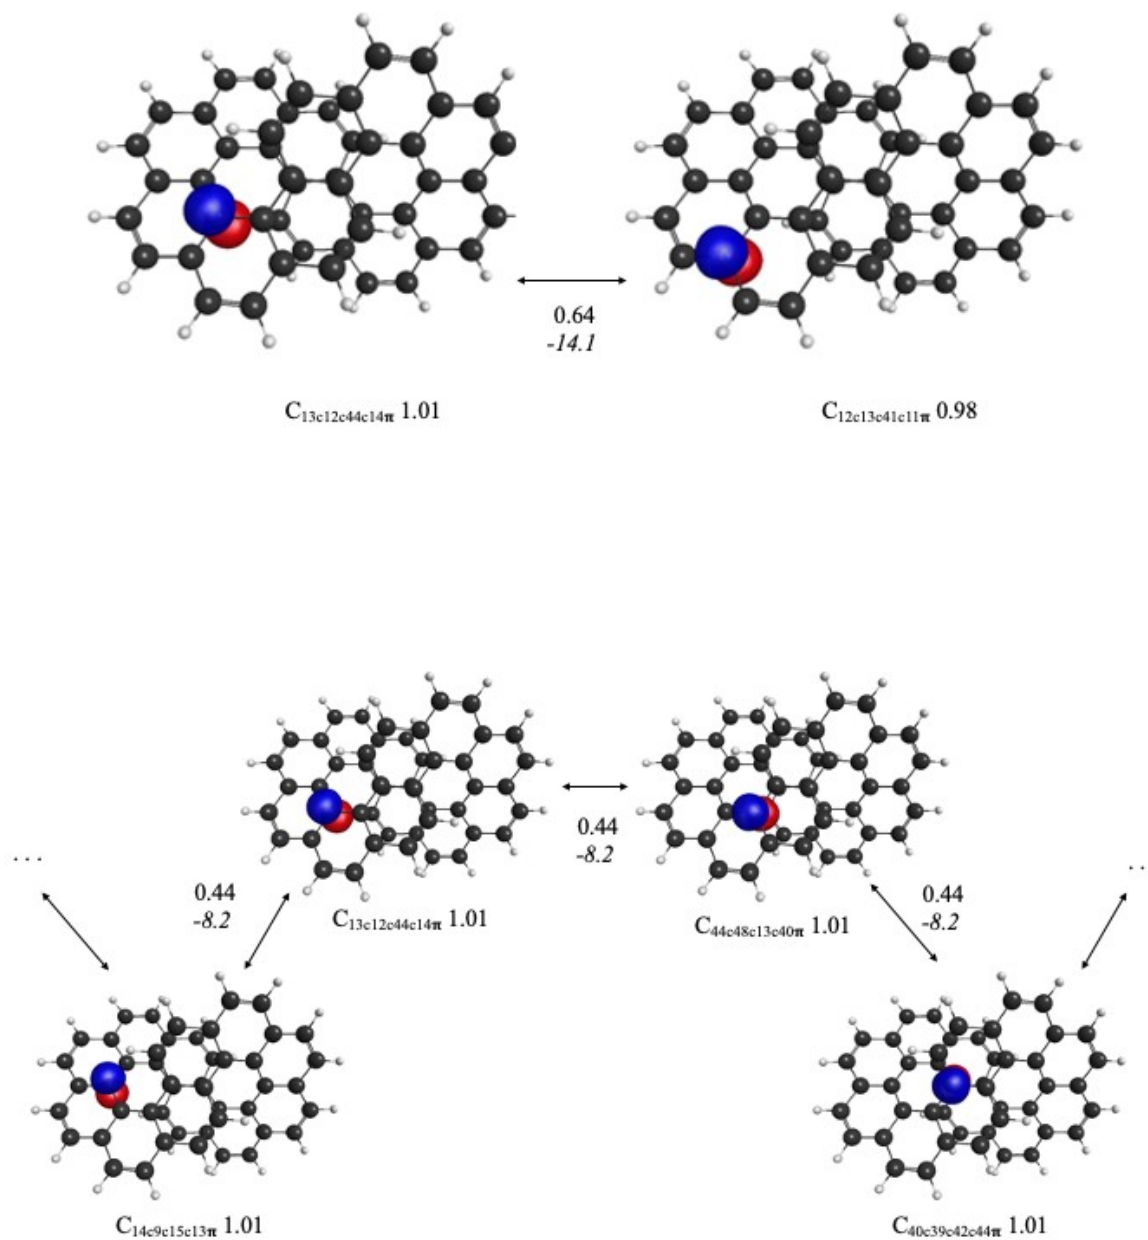

SI Figure SI:7. Non-repetitive  $\sigma$  and  $\pi$ - bonding interactions in infinitene. Bond orders (below arrow), and KBOs (in italics) in kcal/mol are shown between pairs of bonding QUAOs. Each QUAO label is given below each QUAO representation along with the QUAO population.

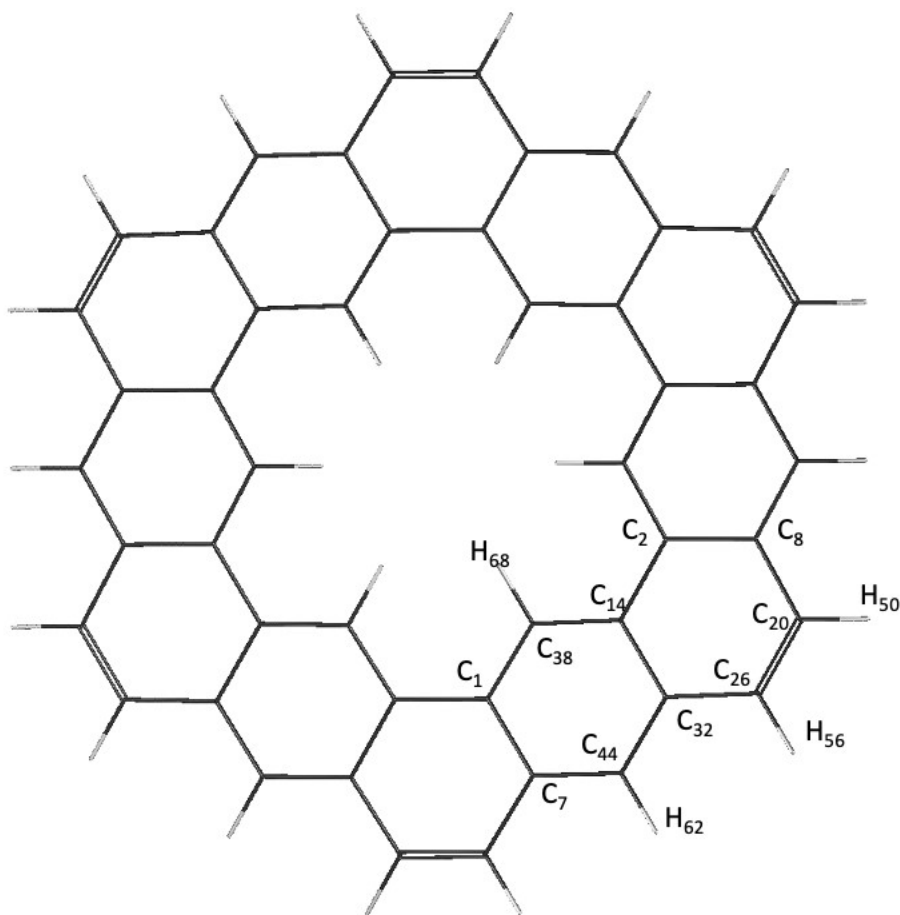

SI Figure SI:8: Atom labels for non-repetitive and symmetric portion of kekulene. The atom numbers shown here were generated by GAMESS

SI Table SI:5: C-H  $\sigma$ -bonding QUAOs for non-repetitive and symmetric portion of kekulene with orbital occupations, bond occupation totals, bond orders, and KBOs (kcal/mol). The atom numbers shown here were generated by GAMESS.

| Kekulene C-H Sigma Bonds                 |              |                                          |              |            |       |                |
|------------------------------------------|--------------|------------------------------------------|--------------|------------|-------|----------------|
| Orbital I                                | Occupation I | Orbital J                                | Occupation J | Bond Total | BO    | KBO (kcal/mol) |
| H <sub>68</sub> C <sub>38</sub> $\sigma$ | 0.87         | C <sub>38</sub> H <sub>68</sub> $\sigma$ | 1.13         | 2.00       | -0.97 | -41.68         |
| H <sub>62</sub> C <sub>44</sub> $\sigma$ | 0.87         | C <sub>44</sub> H <sub>62</sub> $\sigma$ | 1.13         | 2.00       | 0.98  | -39.08         |
| H <sub>50</sub> C <sub>20</sub> $\sigma$ | 0.86         | C <sub>20</sub> H <sub>50</sub> $\sigma$ | 1.14         | 2.00       | -0.97 | -38.94         |
| H <sub>56</sub> C <sub>26</sub> $\sigma$ | 0.86         | C <sub>26</sub> H <sub>56</sub> $\sigma$ | 1.14         | 2.00       | -0.97 | -38.94         |

SI Table SI:6: C-C  $\pi$ -bonding QAOs for non-repetitive and symmetric portion of kekulene with orbital occupations, bond occupation totals, bond orders, and KBOs (kcal/mol). The atom numbers shown here were generated by GAMESS.

| Kekulene C-C Pi Bonds                                 |              |                                                       |              |            |       |                |
|-------------------------------------------------------|--------------|-------------------------------------------------------|--------------|------------|-------|----------------|
| Orbital I                                             | Occupation I | Orbital J                                             | Occupation J | Bond Total | BO    | KBO (kcal/mol) |
| C <sub>26</sub> c <sub>20</sub> $\pi$                 | 1.00         | C <sub>20</sub> c <sub>26</sub> $\pi$                 | 1.00         | 2.01       | 0.87  | -20.4          |
| C <sub>38</sub> c <sub>14</sub> c <sub>1</sub> $\pi$  | 1.01         | C <sub>14</sub> c <sub>38</sub> c <sub>32</sub> $\pi$ | 0.99         | 2.00       | 0.65  | -14.2          |
| C <sub>38</sub> c <sub>14</sub> c <sub>1</sub> $\pi$  | 1.01         | C <sub>1</sub> c <sub>38</sub> c <sub>7</sub> $\pi$   | 0.99         | 2.00       | 0.65  | -14.2          |
| C <sub>44</sub> c <sub>7</sub> c <sub>32</sub> $\pi$  | 1.02         | C <sub>7</sub> c <sub>44</sub> c <sub>1</sub> $\pi$   | 0.99         | 2.01       | -0.64 | -13.9          |
| C <sub>32</sub> c <sub>44</sub> c <sub>14</sub> $\pi$ | 0.99         | C <sub>14</sub> c <sub>38</sub> c <sub>32</sub> $\pi$ | 0.99         | 1.98       | 0.56  | -12.1          |
| C <sub>8</sub> c <sub>45</sub> c <sub>2</sub> $\pi$   | 0.99         | C <sub>2</sub> c <sub>39</sub> c <sub>8</sub> $\pi$   | 0.99         | 1.98       | 0.56  | -12.1          |
| C <sub>20</sub> c <sub>26</sub> $\pi$                 | 1.00         | C <sub>8</sub> c <sub>45</sub> c <sub>2</sub> $\pi$   | 0.99         | 1.99       | 0.38  | -7.2           |
| C <sub>14</sub> c <sub>32</sub> c <sub>38</sub> $\pi$ | 0.99         | C <sub>2</sub> c <sub>39</sub> c <sub>8</sub> $\pi$   | 0.99         | 1.99       | 0.36  | -6.9           |

SI Table SI:7: C-C  $\sigma$ -bonding QAOs for symmetric quarter of kekulene with orbital occupations, bond occupation totals, bond orders, and KBOs (kcal/mol). The atom numbers shown here were generated by GAMESS.

| Kekulene C-C sigma Bonds                 |              |                                          |              |            |      |                |
|------------------------------------------|--------------|------------------------------------------|--------------|------------|------|----------------|
| Orbital I                                | Occupation I | Orbital J                                | Occupation J | Bond Total | BO   | KBO (kcal/mol) |
| C <sub>26</sub> c <sub>20</sub> $\sigma$ | 1.00         | C <sub>20</sub> c <sub>26</sub> $\sigma$ | 1.00         | 2.00       | 0.99 | -55.7          |
| C <sub>14</sub> c <sub>38</sub> $\sigma$ | 1.00         | C <sub>38</sub> c <sub>14</sub> $\sigma$ | 1.00         | 2.00       | 0.98 | -55.4          |
| C <sub>38</sub> c <sub>1</sub> $\sigma$  | 1.00         | C <sub>1</sub> c <sub>38</sub> $\sigma$  | 1.00         | 2.00       | 0.98 | -55.4          |
| C <sub>44</sub> c <sub>32</sub> $\sigma$ | 1.00         | C <sub>32</sub> c <sub>44</sub> $\sigma$ | 1.00         | 2.00       | 0.98 | -54.9          |
| C <sub>7</sub> c <sub>44</sub> $\sigma$  | 1.00         | C <sub>44</sub> c <sub>7</sub> $\sigma$  | 1.00         | 2.00       | 0.98 | -54.9          |
| C <sub>1</sub> c <sub>7</sub> $\sigma$   | 1.00         | C <sub>7</sub> c <sub>1</sub> $\sigma$   | 1.00         | 2.00       | 0.97 | -54.3          |
| C <sub>32</sub> c <sub>14</sub> $\sigma$ | 1.00         | C <sub>14</sub> c <sub>32</sub> $\sigma$ | 1.00         | 2.00       | 0.97 | -54.3          |
| C <sub>8</sub> c <sub>2</sub> $\sigma$   | 1.00         | C <sub>2</sub> c <sub>8</sub> $\sigma$   | 1.00         | 2.00       | 0.97 | -54.3          |
| C <sub>2</sub> c <sub>14</sub> $\sigma$  | 1.00         | C <sub>14</sub> c <sub>2</sub> $\sigma$  | 1.00         | 2.00       | 0.98 | -53.5          |
| C <sub>32</sub> c <sub>26</sub> $\sigma$ | 1.00         | C <sub>26</sub> c <sub>32</sub> $\sigma$ | 1.00         | 2.00       | 0.98 | -52.5          |
| C <sub>20</sub> c <sub>8</sub> $\sigma$  | 1.00         | C <sub>8</sub> c <sub>20</sub> $\sigma$  | 1.00         | 2.00       | 0.98 | -52.5          |

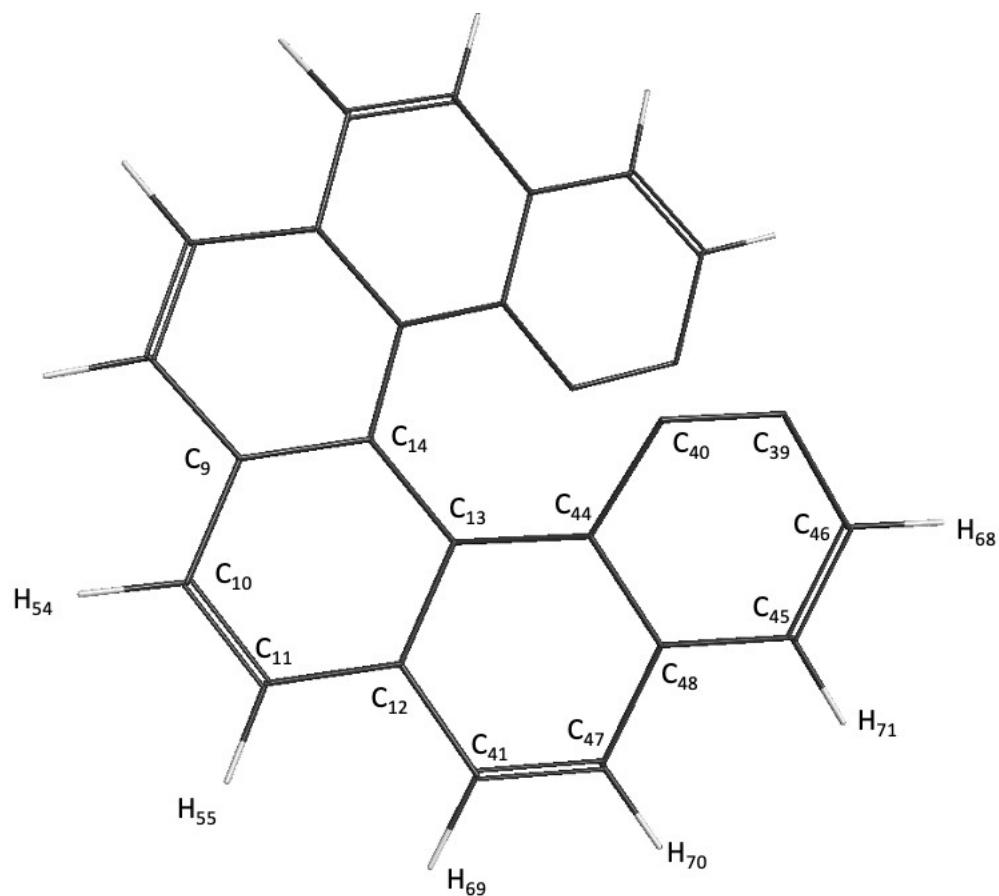

SI Figure SI:9: Atom labels for symmetric quarter of infinitene. The atom numbers shown here were generated by GAMESS.

SI Table SI:8: C-H  $\sigma$ -bonding QUAOs for symmetric quarter of infinitene with orbital occupations, bond occupation totals, bond orders, and KBOs (kcal/mol). The atom numbers shown here were generated by GAMESS.

| Infinitene C-H Sigma Bonds               |              |                                          |              |            |       |                |
|------------------------------------------|--------------|------------------------------------------|--------------|------------|-------|----------------|
| Orbital I                                | Occupation I | Orbital J                                | Occupation J | Bond Total | BO    | KBO (kcal/mol) |
| H <sub>54</sub> c <sub>10</sub> $\sigma$ | 0.86         | C <sub>10</sub> h <sub>54</sub> $\sigma$ | 1.14         | 2.00       | -0.97 | -38.19         |
| H <sub>55</sub> c <sub>11</sub> $\sigma$ | 0.86         | C <sub>11</sub> h <sub>55</sub> $\sigma$ | 1.14         | 2.00       | -0.97 | -38.20         |
| H <sub>68</sub> c <sub>46</sub> $\sigma$ | 0.85         | C <sub>46</sub> h <sub>68</sub> $\sigma$ | 1.15         | 2.00       | 0.97  | -38.22         |
| H <sub>69</sub> c <sub>41</sub> $\sigma$ | 0.86         | C <sub>41</sub> h <sub>69</sub> $\sigma$ | 1.14         | 2.00       | 0.97  | -38.19         |
| H <sub>70</sub> c <sub>47</sub> $\sigma$ | 0.86         | C <sub>47</sub> h <sub>70</sub> $\sigma$ | 1.14         | 2.00       | -0.97 | -38.20         |
| H <sub>71</sub> c <sub>45</sub> $\sigma$ | 0.86         | C <sub>45</sub> h <sub>71</sub> $\sigma$ | 1.14         | 2.00       | 0.97  | -38.18         |

SI Table SI:9: C-C  $\pi$ -bonding QUAOs for symmetric quarter of infinitene with orbital occupations, bond occupation totals, bond orders, and KBOs (kcal/mol). The atom numbers shown here were generated by GAMESS.

| Infinitene C-C Pi Bonds                                               |              |                                                                       |              |            |       |                   |
|-----------------------------------------------------------------------|--------------|-----------------------------------------------------------------------|--------------|------------|-------|-------------------|
| Orbital I                                                             | Occupation I | Orbital J                                                             | Occupation J | Bond Total | BO    | KBO<br>(kcal/mol) |
| C <sub>11</sub> c <sub>10</sub> c <sub>12</sub> $\pi$                 | 1.00         | C <sub>10</sub> c <sub>11</sub> c <sub>9</sub> $\pi$                  | 1.01         | 2.01       | 0.81  | -18.7             |
| C <sub>46</sub> c <sub>45</sub> c <sub>39</sub> $\pi$                 | 0.99         | C <sub>45</sub> c <sub>46</sub> c <sub>48</sub> $\pi$                 | 1.02         | 2.01       | 0.80  | -18.6             |
| C <sub>47</sub> c <sub>41</sub> c <sub>48</sub> $\pi$                 | 1.00         | C <sub>41</sub> c <sub>47</sub> c <sub>12</sub> $\pi$                 | 1.02         | 2.01       | -0.80 | -18.5             |
| C <sub>14</sub> c <sub>9</sub> c <sub>13</sub> c <sub>15</sub> $\pi$  | 1.01         | C <sub>9</sub> c <sub>14</sub> c <sub>8</sub> c <sub>10</sub> $\pi$   | 0.98         | 2.00       | 0.65  | -14.3             |
| C <sub>48</sub> c <sub>44</sub> c <sub>47</sub> c <sub>45</sub> $\pi$ | 0.98         | C <sub>44</sub> c <sub>48</sub> c <sub>13</sub> c <sub>40</sub> $\pi$ | 1.01         | 1.99       | -0.64 | -14.1             |
| C <sub>40</sub> c <sub>39</sub> c <sub>42</sub> c <sub>44</sub> $\pi$ | 0.99         | C <sub>39</sub> c <sub>40</sub> c <sub>46</sub> c <sub>34</sub> $\pi$ | 0.99         | 1.97       | 0.65  | -14               |
| C <sub>47</sub> c <sub>41</sub> c <sub>48</sub> $\pi$                 | 1.00         | C <sub>48</sub> c <sub>44</sub> c <sub>47</sub> c <sub>45</sub> $\pi$ | 0.98         | 1.98       | 0.48  | -9.7              |
| C <sub>41</sub> c <sub>47</sub> c <sub>12</sub> $\pi$                 | 1.02         | C <sub>12</sub> c <sub>13</sub> c <sub>41</sub> c <sub>11</sub> $\pi$ | 0.98         | 2.00       | 0.48  | -9.6              |
| C <sub>46</sub> c <sub>45</sub> c <sub>39</sub> $\pi$                 | 0.99         | C <sub>39</sub> c <sub>40</sub> c <sub>46</sub> c <sub>34</sub> $\pi$ | 0.99         | 1.98       | 0.48  | -9.5              |
| C <sub>11</sub> c <sub>10</sub> c <sub>12</sub> $\pi$                 | 1.00         | C <sub>12</sub> c <sub>13</sub> c <sub>41</sub> c <sub>11</sub> $\pi$ | 0.98         | 1.99       | 0.47  | -9.4              |
| C <sub>10</sub> c <sub>11</sub> c <sub>9</sub> $\pi$                  | 1.01         | C <sub>9</sub> c <sub>14</sub> c <sub>8</sub> c <sub>10</sub> $\pi$   | 0.98         | 1.99       | -0.47 | -9.4              |
| C <sub>45</sub> c <sub>46</sub> c <sub>48</sub> $\pi$                 | 1.02         | C <sub>48</sub> c <sub>44</sub> c <sub>47</sub> c <sub>45</sub> $\pi$ | 0.98         | 2.01       | -0.47 | -9.3              |
| C <sub>44</sub> c <sub>48</sub> c <sub>13</sub> c <sub>40</sub> $\pi$ | 1.01         | C <sub>13</sub> c <sub>12</sub> c <sub>44</sub> c <sub>14</sub> $\pi$ | 1.01         | 2.01       | 0.46  | -8.7              |
| C <sub>44</sub> c <sub>48</sub> c <sub>13</sub> c <sub>40</sub> $\pi$ | 1.01         | C <sub>40</sub> c <sub>39</sub> c <sub>42</sub> c <sub>44</sub> $\pi$ | 0.99         | 1.99       | 0.44  | -8.3              |
| C <sub>14</sub> c <sub>9</sub> c <sub>13</sub> c <sub>15</sub> $\pi$  | 1.01         | C <sub>13</sub> c <sub>12</sub> c <sub>44</sub> c <sub>14</sub> $\pi$ | 1.01         | 2.02       | -0.44 | -8.0              |

SI Table SI:10: C-C  $\sigma$ -bonding QUAOs for symmetric quarter of infinitene with orbital occupations, bond occupation totals, bond orders, and KBOs (kcal/mol). The atom numbers shown here were generated by GAMESS.

| Infinitene C-C sigma Bonds               |              |                                          |              |            |      |                |
|------------------------------------------|--------------|------------------------------------------|--------------|------------|------|----------------|
| Orbital I                                | Occupation I | Orbital J                                | Occupation J | Bond Total | BO   | KBO (kcal/mol) |
| C <sub>10</sub> c <sub>11</sub> $\sigma$ | 1.00         | C <sub>11</sub> c <sub>10</sub> $\sigma$ | 1.00         | 2.00       | 0.98 | -55.8          |
| C <sub>41</sub> c <sub>47</sub> $\sigma$ | 1.00         | C <sub>47</sub> c <sub>41</sub> $\sigma$ | 1.00         | 2.00       | 0.98 | -55.6          |
| C <sub>45</sub> c <sub>46</sub> $\sigma$ | 1.00         | C <sub>46</sub> c <sub>45</sub> $\sigma$ | 1.00         | 2.00       | 0.98 | -55.6          |
| C <sub>48</sub> c <sub>44</sub> $\sigma$ | 1.00         | C <sub>44</sub> c <sub>48</sub> $\sigma$ | 1.00         | 2.00       | 0.98 | -54.7          |
| C <sub>39</sub> c <sub>40</sub> $\sigma$ | 1.00         | C <sub>40</sub> c <sub>39</sub> $\sigma$ | 1.00         | 2.00       | 0.98 | -54.7          |
| C <sub>12</sub> c <sub>13</sub> $\sigma$ | 1.00         | C <sub>13</sub> c <sub>12</sub> $\sigma$ | 1.00         | 2.00       | 0.98 | -54.4          |
| C <sub>9</sub> c <sub>14</sub> $\sigma$  | 1.00         | C <sub>14</sub> c <sub>9</sub> $\sigma$  | 1.00         | 2.00       | 0.98 | -54.3          |
| C <sub>40</sub> c <sub>44</sub> $\sigma$ | 1.00         | C <sub>44</sub> c <sub>40</sub> $\sigma$ | 1.00         | 2.00       | 0.98 | -53.9          |
| C <sub>44</sub> c <sub>13</sub> $\sigma$ | 1.00         | C <sub>13</sub> c <sub>44</sub> $\sigma$ | 1.01         | 2.00       | 0.98 | -53.7          |
| C <sub>47</sub> c <sub>48</sub> $\sigma$ | 1.00         | C <sub>48</sub> c <sub>47</sub> $\sigma$ | 1.00         | 2.00       | 0.98 | -53.3          |
| C <sub>48</sub> c <sub>45</sub> $\sigma$ | 1.01         | C <sub>45</sub> c <sub>48</sub> $\sigma$ | 0.99         | 2.00       | 0.98 | -53.1          |
| C <sub>46</sub> c <sub>39</sub> $\sigma$ | 0.99         | C <sub>39</sub> c <sub>46</sub> $\sigma$ | 1.01         | 2.00       | 0.98 | -53.1          |
| C <sub>11</sub> c <sub>12</sub> $\sigma$ | 1.00         | C <sub>12</sub> c <sub>11</sub> $\sigma$ | 1.00         | 2.00       | 0.98 | -53.0          |
| C <sub>13</sub> c <sub>14</sub> $\sigma$ | 1.00         | C <sub>14</sub> c <sub>13</sub> $\sigma$ | 1.00         | 2.00       | 0.98 | -53.0          |
| C <sub>12</sub> c <sub>41</sub> $\sigma$ | 1.00         | C <sub>41</sub> c <sub>12</sub> $\sigma$ | 0.99         | 2.00       | 0.98 | -53.0          |
| C <sub>9</sub> c <sub>10</sub> $\sigma$  | 1.00         | C <sub>10</sub> c <sub>9</sub> $\sigma$  | 1.00         | 2.00       | 0.98 | -52.9          |
